# Supplementary material for: Health Patterns among Migrant and Non-Migrant Middle- and Older-Aged Individuals in Europe—Analyses Based on Share 2004–2017
Source: MDPI journal article supplement (doi:10.3390/ijerph182212047), 2021-11-16
Supplement: s1 [file s1]

# Supplement

**Table S1 Results of logistic regression models, including interaction terms (odds ratios, 95% confidence intervals and p-values)**

| Parameter                                | Limited Global Activity Limitation Index (GALI) |              |        | Depression |              |        | Poorer Self-rated Health |              |        |
|------------------------------------------|-------------------------------------------------|--------------|--------|------------|--------------|--------|--------------------------|--------------|--------|
|                                          | Odds Ratio                                      | 95% CI       | p      | Odds Ratio | 95% CI       | p      | Odds Ratio               | 95% CI       | p      |
| (Intercept)                              | 0.93                                            | (0.85, 1.02) | 0.120  | 0.58       | (0.53, 0.65) | < .001 | 4.94                     | (4.46, 5.47) | < .001 |
| Wave                                     | 1.02                                            | (1.01, 1.03) | 0.004  | 1.03       | (1.01, 1.04) | < .001 | 1.02                     | (1.00, 1.03) | 0.035  |
| Migrant                                  | 1.30                                            | (1.07, 1.59) | 0.009  | 1.42       | (1.14, 1.77) | 0.002  | 1.13                     | (0.90, 1.42) | 0.281  |
| Age (between subjects)                   | 0.94                                            | (0.86, 1.02) | 0.144  | 1.03       | (0.93, 1.14) | 0.526  | 0.92                     | (0.83, 1.01) | 0.079  |
| Female gender                            | 0.94                                            | (0.87, 1.02) | 0.138  | 0.98       | (0.89, 1.07) | 0.628  | 0.95                     | (0.87, 1.04) | 0.277  |
| Area of Living                           |                                                 |              |        |            |              |        |                          |              |        |
| <i>Metropolitan (Reference)</i>          | 1.00                                            | -            | -      | 1.00       | -            | -      | 1.00                     | -            | -      |
| <i>Metropolitan area</i>                 | 0.99                                            | (0.91, 1.07) | 0.775  | 0.93       | (0.85, 1.02) | 0.107  | 0.92                     | (0.84, 1.00) | 0.058  |
| <i>Large City</i>                        | 1.00                                            | (0.94, 1.08) | 0.909  | 0.96       | (0.88, 1.03) | 0.261  | 0.95                     | (0.88, 1.03) | 0.211  |
| <i>Small city</i>                        | 0.98                                            | (0.91, 1.05) | 0.508  | 0.87       | (0.81, 0.94) | < .001 | 1.02                     | (0.94, 1.10) | 0.646  |
| <i>Rural</i>                             | 1.15                                            | (1.08, 1.23) | < .001 | 0.89       | (0.83, 0.96) | 0.003  | 1.07                     | (0.99, 1.15) | 0.084  |
| Education                                |                                                 |              |        |            |              |        |                          |              |        |
| <i>lower/upper secondary (Reference)</i> | 1.00                                            | -            | -      | 1.00       | -            | -      | 1.00                     | -            | -      |
| <i>post-secondary</i>                    | 0.74                                            | (0.70, 0.77) | < .001 | 0.57       | (0.54, 0.60) | < .001 | 0.60                     | (0.57, 0.64) | < .001 |
| <i>tertiary</i>                          | 0.53                                            | (0.50, 0.56) | < .001 | 0.39       | (0.37, 0.42) | < .001 | 0.33                     | (0.31, 0.36) | < .001 |
| Household Size                           | 1.00                                            | (0.99, 1.02) | 0.657  | 0.98       | (0.96, 1.00) | 0.096  | 1.00                     | (0.98, 1.02) | 0.775  |
| Age (within subject)                     | 1.02                                            | (1.00, 1.04) | 0.032  | 0.99       | (0.97, 1.01) | 0.498  | 1.02                     | (1.00, 1.05) | 0.064  |
| wave * Migrant                           | 0.99                                            | (0.95, 1.04) | 0.798  | 0.95       | (0.90, 1.00) | 0.048  | 1.03                     | (0.98, 1.08) | 0.193  |
| wave * Age                               | 1.01                                            | (0.99, 1.03) | 0.294  | 0.99       | (0.97, 1.02) | 0.576  | 1.01                     | (0.99, 1.04) | 0.218  |

|                               |         |              |       |         |              |       |         |              |       |
|-------------------------------|---------|--------------|-------|---------|--------------|-------|---------|--------------|-------|
| Migrant * Age                 | 0.90    | (0.69, 1.18) | 0.460 | 1.01    | (0.74, 1.38) | 0.948 | 1.01    | (0.74, 1.38) | 0.951 |
| wave * Female                 | 1.02    | (1.00, 1.03) | 0.033 | 1.01    | (0.99, 1.03) | 0.532 | 1.02    | (1.00, 1.04) | 0.106 |
| Migrant * Female              | 1.11    | (0.86, 1.43) | 0.434 | 0.84    | (0.63, 1.13) | 0.255 | 1.41    | (1.04, 1.93) | 0.027 |
| Age * Female                  | 1.05    | (0.94, 1.18) | 0.354 | 1.08    | (0.95, 1.23) | 0.255 | 1.04    | (0.92, 1.18) | 0.493 |
| Wave * Migrant * Age          | 1.02    | (0.96, 1.08) | 0.555 | 0.98    | (0.91, 1.07) | 0.694 | 0.99    | (0.92, 1.06) | 0.747 |
| Wave * Migrant * Female       | 0.97    | (0.92, 1.02) | 0.260 | 1.04    | (0.98, 1.12) | 0.203 | 0.92    | (0.86, 0.99) | 0.018 |
| Wave * Age * Female           | 0.99    | (0.97, 1.01) | 0.325 | 1.00    | (0.97, 1.03) | 0.808 | 1.00    | (0.97, 1.02) | 0.717 |
| Migrant * Age * Female        | 1.06    | (0.74, 1.50) | 0.755 | 0.77    | (0.50, 1.18) | 0.223 | 0.89    | (0.59, 1.33) | 0.570 |
| Wave * Migrant * Age * Female | 0.99    | (0.92, 1.07) | 0.800 | 1.04    | (0.93, 1.15) | 0.494 | 1.04    | (0.95, 1.14) | 0.433 |
| Number of observations        | 230,278 |              |       | 179,426 |              |       | 230,184 |              |       |

To study the country-specific trends in GALL, depression and self-perceived health over time, we employed meta-analyses with random-effect models. Within each country subsample, one logistic regression model for each wave was calculated and the proportions of GALL, depression and self-perceived health predicted by migrant vs. non-migrant were estimated. These estimated proportions were used effect sizes for the meta-analyses. The resulting coefficients indicate the change (increase/decrease) in the proportion of our health indicators over time (per year) for migrants and non-migrants within each country. Meta-analyses were conducted using the R-package “metafor” (Viechtbauer, W. (2010). Conducting meta-analyses in R with the metafor package. *Journal of Statistical Software*, 36(3), 1-48. <https://doi.org/10.18637/jss.v036.i03>).
